# Supplementary material for: Long-term neurodevelopmental consequences of intrauterine exposure to lithium and antipsychotics: a systematic review and meta-analysis
Source: PubMed Central journal article supplement (PMC6133089; doi:10.1007/s00787-018-1177-1), 2018-06-11

a.

### Risk of bias: Lithium

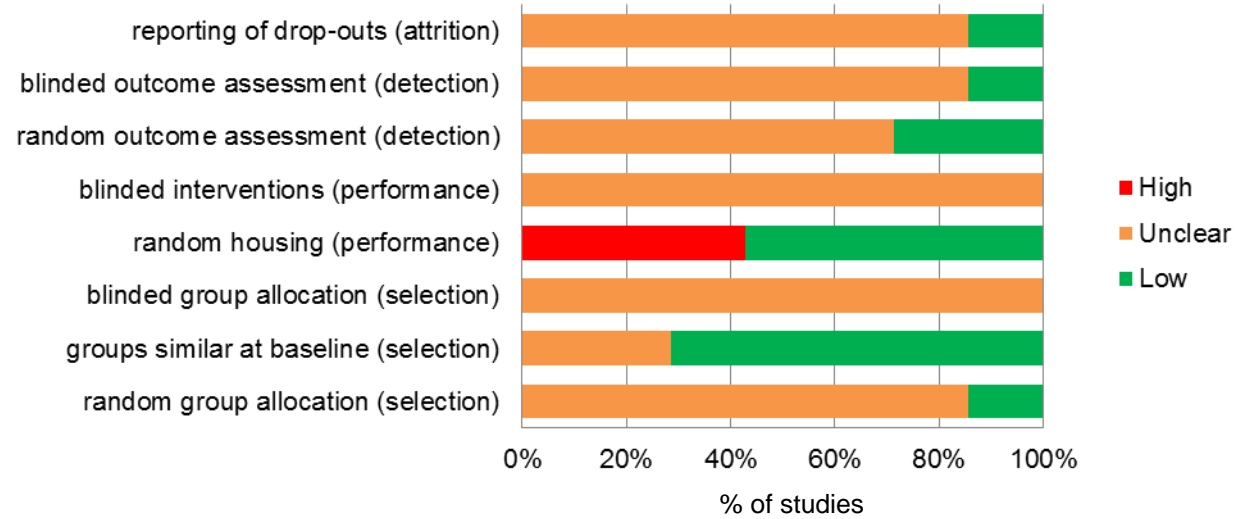

b.

### Risk of bias: Antipsychotic

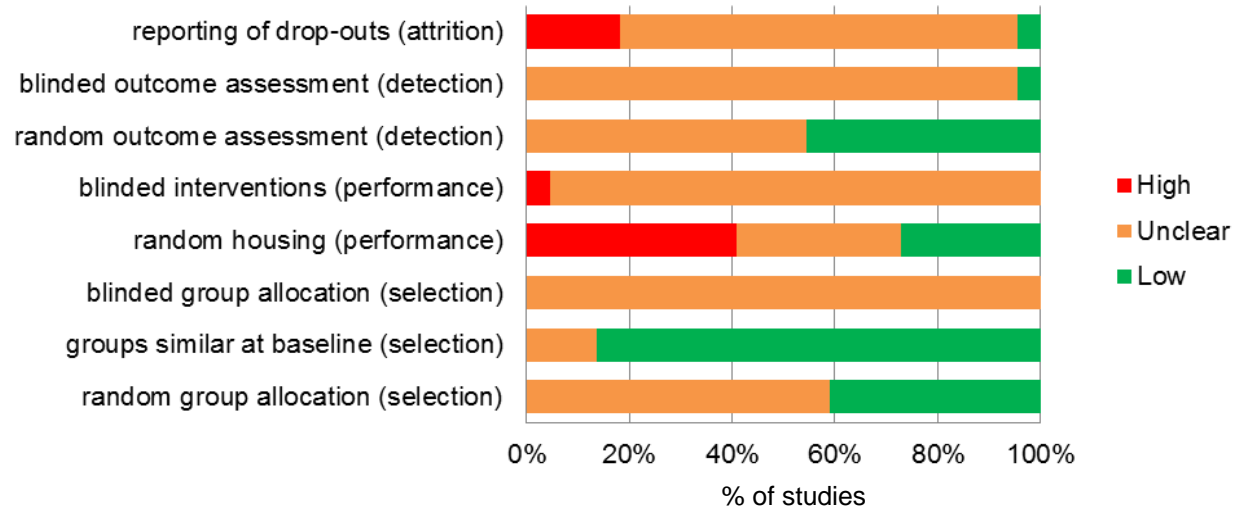

Supplement: 787_2018_1177_MOESM3_ESM.pdf [file 787_2018_1177_MOESM3_ESM.pdf]
